# Supplementary material for: A composite approach to produce reference datasets for extratropical cyclone tracks: application to Mediterranean cyclones
Source: Copernicus journal article supplement (doi:10.5194/wcd-4-639-2023), 2023-07-21
Supplement: Supplementary file 1 [file wcd-4-639-2023-supplement.zip]

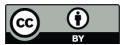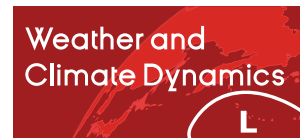

Open Access

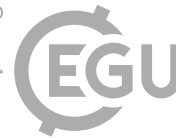

## *Supplement of*

# **A composite approach to produce reference datasets for extratropical cyclone tracks: application to Mediterranean cyclones**

**Emmanouil Flaounas et al.**

*Correspondence to:* Emmanouil Flaounas (em.flounas@hcmr.gr)

- wcd-4-639-2023-supplement-title-page.pdf
- supplement
  - List\_cyclones.xlsx
  - TRACKS\_CL10.dat
  - TRACKS\_CL2.dat
  - TRACKS\_CL3.dat
  - TRACKS\_CL4.dat
  - TRACKS\_CL5.dat
  - TRACKS\_CL6.dat
  - TRACKS\_CL7.dat
  - TRACKS\_CL8.dat
  - TRACKS\_CL9.dat

The copyright of individual parts of the supplement might differ from the article licence.
